# Supplementary material for: Intravital FRET: Probing Cellular and Tissue Function in Vivo
Source: Int J Mol Sci. 2015 May 21;16(5):11713–27. doi: 10.3390/ijms160511713 (PMC4463726; doi:10.3390/ijms160511713)
Supplement: Supplementary file 1 [file ijms-16-11713-s001.zip › ijms-79058-Supplementary Information/ijms-79058-Supplementary Information.pdf]

# Supplementary Information

## Titration of TN L15 construct by FRET FLIM

The TN L15 construct is a FRET-based construct containing the calcium sensitive molecule Troponin C. Troponin C has two high affinity and two low affinity calcium binding sites, which are also sensitive to magnesium but at higher concentrations (mM range). The FRET pair, *i.e.*, Cerulean as donor and Citrine as acceptor, is bound to Troponin C in such a way, that calcium binding at all four sites is detectable by FRET. Hence, the titration curve of the FRET ratio for the TN L15 construct is governed by a double Boltzmann distribution, characterized by two  $K_d$  values—one for the high affinity and one for the low affinity binding sites. Both by ratiometric FRET and by FRET FLIM, only one effective  $K_d$  (only a single averaged Boltzmann distribution) can be acquired.

The equation we used for the approximation of the titration of TN L15 by FRET FLIM in Figure 4A is:

$$FRET = FRET_{\max} + (FRET_{\max} - FRET_{\min}) / (1 - e^{\text{Hill}([Ca] - K_d)}) \quad (1)$$

## Biexponential approximation in FRET FLIM

The fluorescence decay curve of the Cerulean as FRET donor of TN L15 can be modeled by a biexponential decay function:

$$F(t) = a_1 \cdot e^{-(t-t_0)/\tau_1} + a_2 \cdot e^{-(t-t_0)/\tau_2} \quad (2)$$

with  $F(t)$  the time-resolved fluorescence signal,  $\tau_1$  the fluorescence lifetime of Cerulean entirely quenched by FRET,  $\tau_2$  the fluorescence lifetime of unquenched Cerulean and  $a_1$  and  $a_2$  the concentration of FRET-quenched and unquenched Cerulean, respectively. Hence, the ratio  $a_1/(a_1 + a_2)$  represents the FRET ratio.

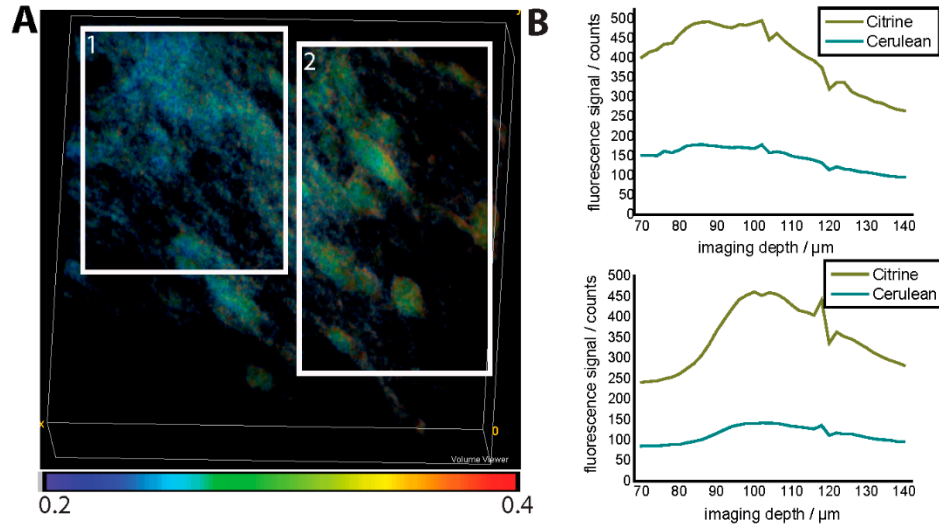

**Figure S1.** Fluorescence signals of Cerulean and Citrine, respectively, in the brain stem of a healthy, untreated CerTN L15 mouse corresponding to the two different regions in Figure 2A,B.

**Movie S1.** Time lapse of the NFRET ratio in a  $300 \times 300 \times 70 \mu\text{m}^3$  region in the brain stem of a *CerTN L15* mouse before and during treatment with KCl.  $\lambda_{\text{exc}} = 850 \text{ nm}$ ,  $\lambda_{\text{em}} (\text{Cerulean}) = 475 \pm 20 \text{ nm}$ ,  $\lambda_{\text{em}} (\text{Citrine}) = 535 \pm 25 \text{ nm}$ .

**Movie S2.** Time lapse of the Cerulean fluorescence signal in a  $300 \times 300 \times 50 \mu\text{m}^3$  region in the brain stem of a *CerTN L15* mouse after treatment with KCl.  $\lambda_{\text{exc}} = 850 \text{ nm}$ ,  $\lambda_{\text{em}} (\text{Cerulean}) = 475 \pm 20 \text{ nm}$ .

**Movie S3.** Time lapse of the Citrine fluorescence signal in a  $300 \times 300 \times 50 \mu\text{m}^3$  region in the brain stem of a *CerTN L15* mouse after treatment with KCl.  $\lambda_{\text{exc}} = 850 \text{ nm}$ ,  $\lambda_{\text{em}} (\text{Citrine}) = 535 \pm 25 \text{ nm}$ .

**Movie S4.** Time lapse of the NFRET ratio corresponding to the Cerulean and Citrine signals in Movies S2 and S3.
